# Supplementary material
Source: ML conference proceedings conference paper supplement (https://openreview.net/forum?id=IXrQxlxr0iB)
Supplement: supplementary_material [file attachment]

## A APPENDIX

### A.1 PRETRAINING

#### A.1.1 PRETRAINING DATASET

For ERNIE-SPARSE pretraining, we use Wikipedia (English Wikipedia dump<sup>2</sup>; 12GB), BookCorpus (Zhu et al., 2015) (4.6GB), Realnews (Zellers et al., 2019) (7.4GB) and Stories (Trinh & Le, 2018) (11GB). For pretraining, we also sample 5% training data as the validation set to monitor the training process. Table 8 shows statistics of the pretraining data.

| Source     | Tokens | Avg doc len |
|------------|--------|-------------|
| Wikipedia  | 3.0B   | 515         |
| BookCorpus | 1.2B   | 23K         |
| Realnews   | 1.8B   | 3.0K        |
| Stories    | 2.7B   | 8.7K        |

Table 8: Pretraining data statistics

| Parameter              | ERNIE-SPARSE |
|------------------------|--------------|
| $\alpha$ of $L_{SAOR}$ | 0            |
| learning rate          | $3e-5$       |
| batch size             | 256          |
| weight decay           | 0.1          |
| warmup steps           | 10k          |
| total steps            | 1m           |
| max seq length         | 4096         |
| embedding dim          | 768          |
| #head                  | 12           |
| #layer                 | 12           |
| activation layer       | gelu         |
| dropout                | 0.1          |
| attn dropout           | 0.1          |

Table 9: Hyperparameters for the ERNIE-SPARSE for Pretraining

#### A.1.2 PRETRAINING HYPERPARAMETERS

We split any document longer than 4096 into multiple documents and we joined multiple documents that were much smaller than 4096. During the pre-training phase, we only use mask language model for training tasks. Specifically, we mask 15% of tokens in these four datasets, and train ERNIE-SPARSE to predict the mask. We warm start ERNIE-SPARSE from RoBERTa’s checkpoint. The hyperparameters for these ERNIE-SPARSE are given in Table 9. We use a learning rate warmup over the first 10,000 steps, and polynomial decay of the learning rate. Notably, attention weight in HST are shared with sparse attention.

### A.2 TASKS

To evaluate ERNIE-SPARSE, we chose three benchmarks, including LRA, and text classification, as well as question answering. The latter two need to follow the pretraining and finetuning paradigm. Table 10 lists the data distribution, task type, evaluation metric of each dataset.

#### A.2.1 HYPERPARAMETERS FOR LRA

Table 11 gives the detail list of hyperparameters used to get results shown in Table 1.

#### A.2.2 HYPERPARAMETERS FOR CLASSIFICATION AND QA

Table 12 gives the detail list of hyperparameters used to get results shown in Table 2 and Table 4.

| Corpus                 | Task                     | Split | #Sample | Length in percentile |       |       |         | #Label     | Metrics       |
|------------------------|--------------------------|-------|---------|----------------------|-------|-------|---------|------------|---------------|
|                        |                          |       |         | 50%                  | 90%   | 95%   | max     |            |               |
| Long Range Arena (LRA) |                          |       |         |                      |       |       |         |            |               |
| ListOps                | Logical Reasoning        | Train | 96k     | 954                  | 1646  | 1800  | 1999    | 10         | Acc           |
|                        |                          | Dev   | 2k      | 960                  | 1648  | 1813  | 1999    |            |               |
|                        |                          | Test  | 2k      | 947                  | 1657  | 1803  | 1999    |            |               |
| Text                   | Sentiment Classification | Train | 25k     | 979                  | 2615  | 3431  | 13704   | 2          | Acc           |
|                        |                          | Dev   | 25k     | 962                  | 2543  | 3333  | 12988   |            |               |
| Retrieval              | Retrieval                | Train | 147k    | 7648                 | 13467 | 20495 | 72885   | 2          | Acc           |
|                        |                          | Dev   | 18k     | 7665                 | 13359 | 19928 | 72885   |            |               |
|                        |                          | Test  | 17k     | 7702                 | 15955 | 22427 | 50012   |            |               |
| Image                  | Category Classification  | Train | 45k     | -                    | -     | -     | 1024    | 10         | Acc           |
|                        |                          | Dev   | 5k      | -                    | -     | -     | 1024    |            |               |
|                        |                          | Test  | 10k     | -                    | -     | -     | 1024    |            |               |
| PathFinder             | Image Reasoning          | Train | 160k    | -                    | -     | -     | 1024    | 2          | Acc           |
|                        |                          | Dev   | 20k     | -                    | -     | -     | 1024    |            |               |
|                        |                          | Test  | 20k     | -                    | -     | -     | 1024    |            |               |
| Text Classification    |                          |       |         |                      |       |       |         |            |               |
| Arxiv                  | Category Classification  | Train | 33k     | 14733                | 34209 | 43951 | 1121751 | 11         | Micro F1      |
|                        |                          | Test  | 3.3k    | 14710                | 32417 | 40965 | 850540  |            |               |
| IMDB                   | Sentiment Classification | Train | 25k     | 215                  | 569   | 748   | 3084    | 2          | Micro F1      |
|                        |                          | Test  | 25k     | 212                  | 550   | 724   | 2778    |            |               |
| Hyperpartisan          | News Classification      | Train | 516     | 536                  | 1517  | 1990  | 5560    | 2          | Micro F1      |
|                        |                          | Dev   | 65      | 520                  | 1535  | 1971  | 2637    |            |               |
|                        |                          | Test  | 65      | 637                  | 1771  | 1990  | 5560    |            |               |
| Question Answering     |                          |       |         |                      |       |       |         |            |               |
| TriviaQA               | Question Answering       | Train | 110k    | 4576                 | 5027  | 5166  | 10091   | Span       | Macro F1 & EM |
|                        |                          | Dev   | 14k     | 4577                 | 5026  | 5169  | 10210   |            |               |
| WikiHop                | Question Answering       | Train | 43k     | 1313                 | 3001  | 3685  | 19747   | Candidates | Acc           |
|                        |                          | Dev   | 5.1k    | 1413                 | 3184  | 3871  | 17004   |            |               |

Table 10: Downstream tasks statistics. Samples of tasks Image and PathFinder are all  $32 \times 32$  images.

| Hyperparameter                                           | ListOps            | Text        | Retrieval   | Image  | Pathfinder |
|----------------------------------------------------------|--------------------|-------------|-------------|--------|------------|
| Hyperparameters for HST and SAOR                         |                    |             |             |        |            |
| HST pooling                                              | { MIN, MEAN, MAX } |             |             |        |            |
| $\alpha$ of $\mathcal{L}_{SAOR}$                         | { 0.5, 5, 10 }     |             |             |        |            |
| #roll tokens of $\mathcal{L}_{SAOR}$                     | { 2, 8, 16 }       |             |             |        |            |
| Fixed hyperparameters provided by LRA (Tay et al., 2021) |                    |             |             |        |            |
| learning rate                                            | 5e-2               | 5e-2        | 5e-2        | 5e-4   | 1e-3       |
| batch size                                               | 32                 | 32          | 32          | 256    | 512        |
| weight decay                                             | 1e-1               | 1e-1        | 1e-1        | 0      | 0          |
| warmup                                                   | 1000               | 8000        | 8000        | 175    | 312        |
| max seq length                                           | 2000               | 1000        | 4000        | 1024   | 1024       |
| embedding dim                                            | 512                | 256         | 128         | 32     | 64         |
| #head                                                    | 8                  | 4           | 4           | 1      | 2          |
| #layer                                                   | 4                  | 4           | 4           | 1      | 4          |
| Q/K/V dim                                                | 512                | 256         | 128         | 32     | 32         |
| MLP dim                                                  | 1024               | 1024        | 512         | 64     | 64         |
| dropout                                                  | 0.1                | 0.1         | 0.1         | 0.3    | 0.2        |
| attn dropout                                             | 0.1                | 0.1         | 0.1         | 0.2    | 0.1        |
| lr decay                                                 | root square        | root square | root square | cosine | cosine     |

Table 11: The upper part is the hyperparameter related to ERNIE-SPARSE, while the lower part is the fixed hyperparameter provided by LRA and cannot be changed.

### A.3 COMPLEXITY ANALYSIS

In this section, we analyze the complexity of ERNIE-SPARSE. For attention module in ERNIE-SPARSE, it can be analyzed from sparse attention and hierarchical sparse attention modules. For the former, ERNIE-SPARSE’s sparse attention pattern is the closest to BigBird with  $O(N)$  time complexity (Zaheer et al., 2020) with in practice the maximum length is set as  $N = 4096$  with the 3 blocks, each of size  $w = 64$ , and resulting in  $4096 \times 64$  computations (note that we ignore the global

<sup>2</sup><https://dumps.wikimedia.org/enwiki/>

| Hyperparameter                       | Arxiv | IMDB | Hyperpartisan | WikiHop | TriviaQA |
|--------------------------------------|-------|------|---------------|---------|----------|
| HST pooling                          | mean  | mean | mean          | mean    | mean     |
| $\alpha$ of $\mathcal{L}_{SAOR}$     | 10    | 0.1  | 0             | 10      | 3        |
| #roll tokens of $\mathcal{L}_{SAOR}$ | 8     | 8    | 0             | 8       | 8        |
| learning rate                        | 6e-5  | 1e-5 | 3e-5          | 3e-5    | 3e-5     |
| batch size                           | 48    | 64   | 16            | 48      | 32       |
| epoch                                | 10    | 20   | 20            | 30      | 10       |
| warmup                               | 10%   | 10%  | 10%           | 200     | 10%      |
| max seq len                          | 4096  | 2048 | 1024          | 4096    | 4096     |
| #global token                        |       |      | 128           |         |          |
| local window size                    |       |      | 192           |         |          |
| #random token                        |       |      | 192           |         |          |
| Optimizer                            |       |      | Adam          |         |          |

Table 12: Hyperparameters of classification and question answering tasks.

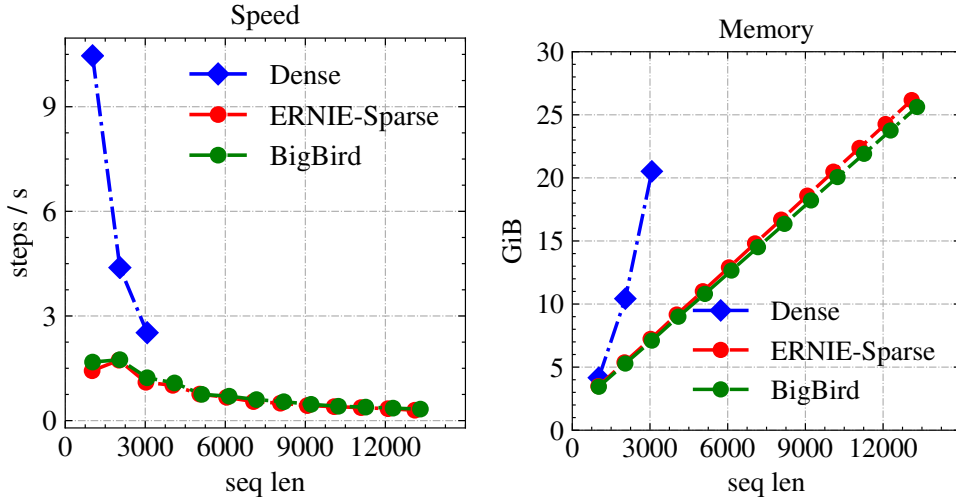

Figure 4: Runtime and memory of full self-attention, ERNIE-SPARSE and BigBird (Zaheer et al., 2020).

attention calculations here for simplicity). For the hierarchical part, because only representative tokens are extracted out for attention, so the real calculations is  $64 \times 64$ , which is far less than the former computation complexity, where  $64 = (N \bmod w) = (4096 \bmod 64)$  is the number of blocks. So the increased time complexity of hierarchical sparse attention can be ignored. At the same time, we also carried out a practical test on V100 32GB GPU. We tested ERNIE-SPARSE and dense attention transformer and BigBird, the result is shown in Figure 4. ERNIE-SPARSE's memory usage scales linearly with the sequence length, unlike the full self-attention mechanism that runs out of memory for long sequences on current GPU. ERNIE-SPARSE and BigBird are almost on par. The speed test data shows that the performance is consistent. The difference between ERNIE Sparse and BigBird is negligible in memory test. Given that ERNIE-SPARSE outperformed BigBird on the test set as mentioned in Section 4, the performance of ERNIE-SPARSE was remarkable.
